# Supplementary material for: CF3: an overlooked chromophore in VCD spectra. A review of recent applications in structural determination
Source: Royal Society of Chemistry journal article supplement (doi:10.1039/c9ra01358j), 2019-01-01
Supplement: c9ra01358j1.pdf [file c9ra01358j1.pdf]

## CF3: AN OVERLOOKED CHROMOPHORE IN VCD SPECTRA. A REVIEW OF RECENT APPLICATIONS IN THE STRUCTURAL DETERMINATION

Sergio Abbate, Giovanna Longhi, Giuseppe Mazzeo, Claudio Villani, Silvija Petković, Renzo Ruzziconi

### Supporting Information

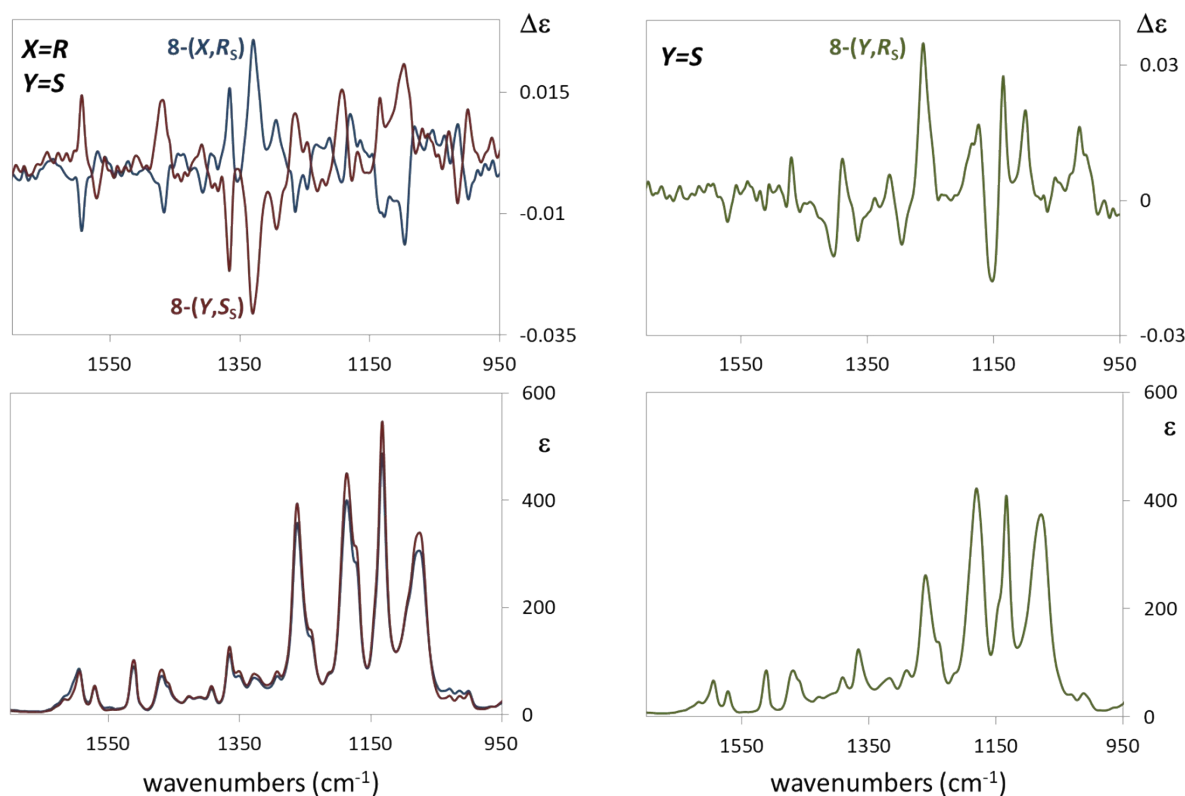

**Figure SI-1.** VCD (top panels) and IR (bottom panels) experimental spectra of two enantiomers of synthesized major diastereomer (left) and minor diastereomer (right) of N-*tert*-butanesulfinyl-1-(quinoline-4-yl)-2,2,2-trifluoroethylamine (**8**) (see text).

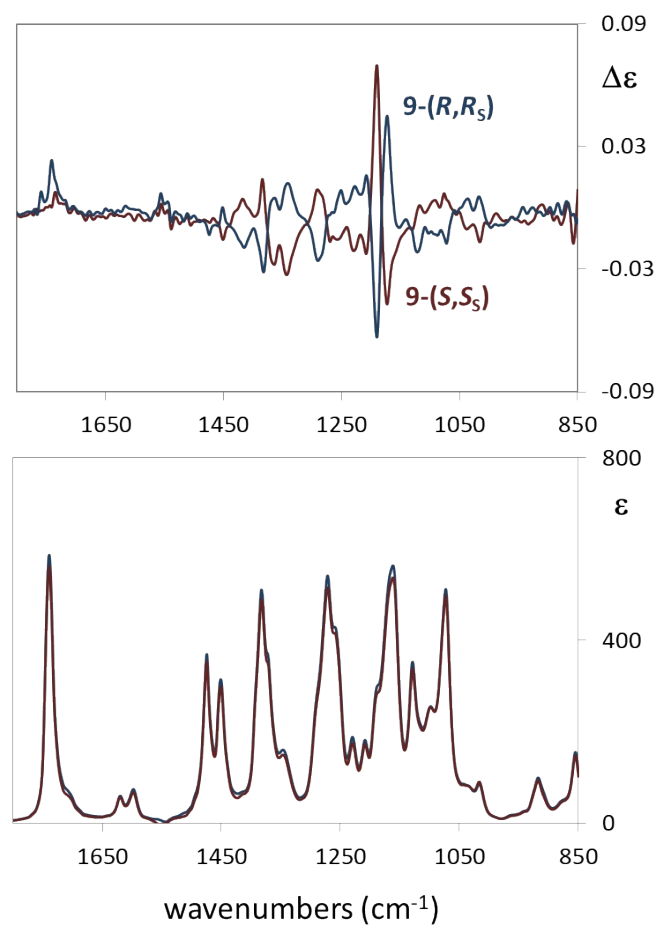

**Figure SI-2.** VCD (top panel) and IR (bottom panel) experimental spectra of two enantiomers of 1-*tert*-butoxycarbonyl-3-{2-[(*tert*butanesulfinyl)amino]3,3,3-trifluoropropyl}-1H-indole (**9**) (see text, ref. 30).

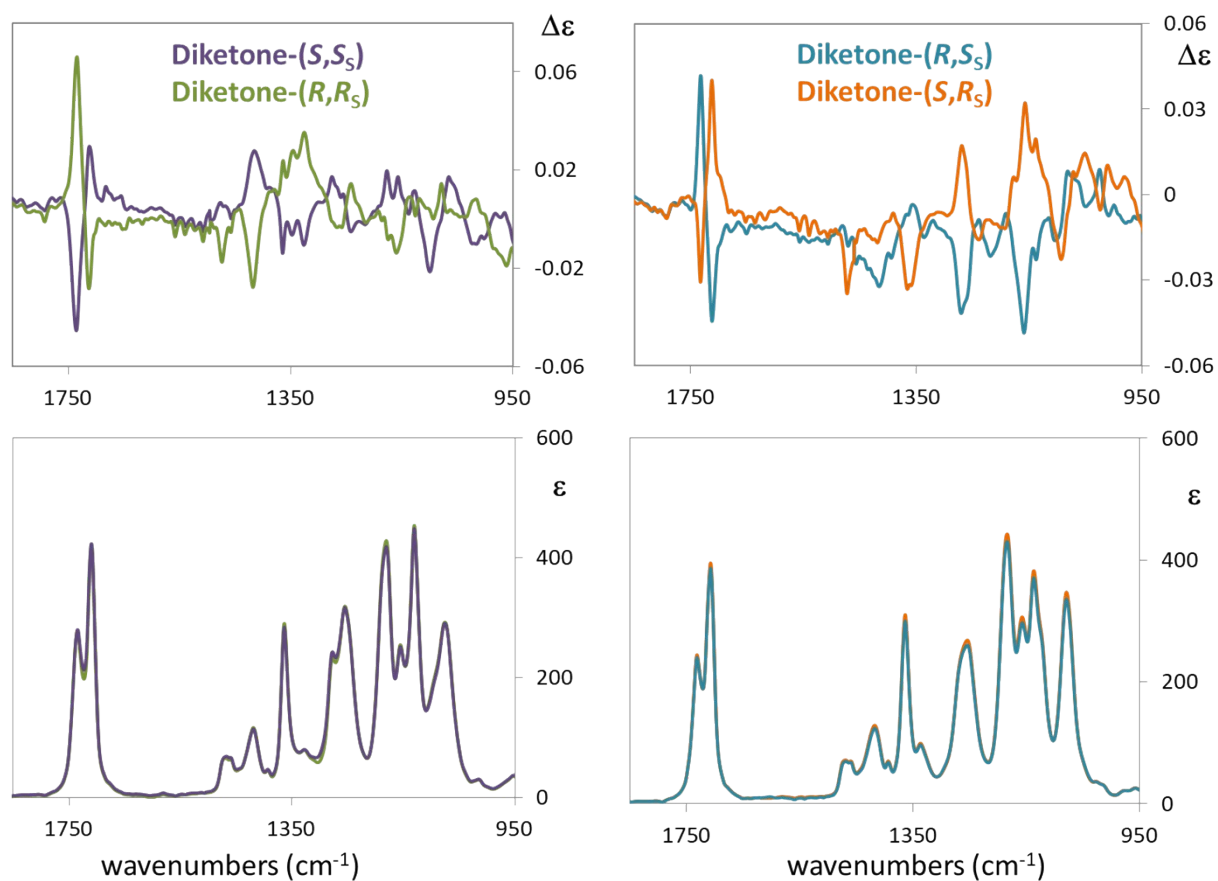

**Figure SI-3.** VCD (top panels) and IR (bottom panels) experimental spectra of the two couple of enantiomers of the possible diketones diastereomers of 2-Acetyl-N-(tert-butanesulfinyl)-3-oxo-1-(trifluoromethyl)butylamine investigated in reference 54 of text.
